# Supplementary material
Source: MDPI journal article supplement (https://www.mdpi.com/2073-4441/15/13/2447)
Supplement: s1 [file s1]

# Effects of long-term exposure of pharmaceuticals and personal care products on algogenic organic matter characteristics

Weiwei Huang<sup>1,2</sup>, Weiwei Lv<sup>1,2</sup>, Quan Yuan<sup>1</sup>, Wenzong Zhou<sup>1,2\*</sup>, Tian Li<sup>3\*</sup>, Bingzhi

Dong<sup>3</sup>

1 Eco-Environmental Protection Research Institute, Shanghai Academy of Agricultural Sciences, Shanghai 201403, China;

2 Laboratory of Integrated Rice-Fish Farming Ecosystem, Ministry of Agriculture and Rural Affairs, Shanghai Agricultural Academy of Sciences, Shanghai 201403, China;

3 School of Environmental Science and Engineering, Tongji University, Shanghai 200092, China;

\* Correspondence: lovecity@outlook.com (W.Z.); hwwswx@126.com (T.L.)

Tel./Fax: +86-21-65982691

Table S1 OD<sub>680</sub> of AOM under various PPCPs treatments at end of experiment

|     | 0 µg/L | 0.25µg/L | 1µg/L | 10 µg/L | 100µg/L | 1000µg/L |
|-----|--------|----------|-------|---------|---------|----------|
| CMZ | 1.535  | 1.692    | 1.712 | 1.506   | 1.483   | 1.503    |
| NPX | 2.525  | 2.621    | 2.545 | 2.763   | 2.52    | 2.39     |
| DFC | 3.088  | 2.889    | 2.93  | 3.008   | 3.099   | 3.158    |

Table S2 SUVA of AOM under various PPCPs treatments at end of experiment

|                 | 0 µg/L | 0.25µg/L | 1µg/L | 10 µg/L | 100µg/L | 1000µg/L |
|-----------------|--------|----------|-------|---------|---------|----------|
| CMZ<br>(day 39) | 0.831  | 0.868    | 0.964 | 0.897   | 1.107   | 1.051    |
| NPX<br>(day 45) | 1.733  | 1.739    | 2.033 | 2.099   | 1.729   | 1.473    |
| DFC<br>(day 41) | 0.753  | 0.552    | 0.530 | 0.623   | 0.636   | 0.627    |
